# Supplementary material for: Same-Sex Parenting in Italy: An Affective and Developmental Psychocultural Analysis
Source: Springer Nature journal article supplement (doi:10.1007/s13178-023-00838-8), 2023-06-24
Supplement: MOESM1 [file 25535244]

| *Supplemental File 1.* Clusters of dense words (ordered by Chi2) - Italian Version | | | |
| --- | --- | --- | --- |
|  |  |  |  |
| **Cluster 1**  ECs 92 (18.44%) | **Cluster 2**  ECs 74 (14.83%) | **Cluster 3**  ECs 195 (39.08%) | **Cluster 4**  ECs 138 (27.66%) |
| scuola | politica | scegliere | politica |
| tribunale | accadere | scelta | vedere |
| lavorare | sociale | casa | finire |
| periodo | diritti civili | rimanere_incinta | riconoscimento |
| gemello | leggi | tempo | fase |
| spagnolo | luogo_comune | futuro | gay |
| verificare | ignoranza | carattere | bimbo |
| solo | culturale | cugino | norma |
| settimana | assenza | figlio_unico | portare_avanti |
| aiutare | appartenenza | asilo | coppia |
| fratello | chiesa | immaginare | affrontare |
| rivolgere | pregiudizio | caro | proteggere |
| città | successo | tradizionale | giuridico |
| credere | evolvere | nido | genetico |
| ragazzino | strada | cena | reparto |
| vedere | giro |  | terapia |
| anni | Canada |  | paese |
|  |  |  |  |
|  |  |  |  |
|  |  |  |  |
|  |  |  |  |
